# Supplementary material for: An explorative cross-sectional analysis of mental health shame and help-seeking intentions in different lifestyles
Source: PubMed Central journal article supplement (PMC10319876; doi:10.1038/s41598-023-37955-8), 2023-07-04
Supplement: 41598_2023_37955_MOESM1_ESM.pdf [file 41598_2023_37955_MOESM1_ESM.pdf]

*Supplementary Information*

Table S1: Sample characteristics for each lifestyle, frequencies by column (except for the distribution of lifestyle), the column „missings“ includes missing values for survey participants being not assigned to a lifestyle because of missing values in at least one domain..... 2

Table S2.1: Hierarchical linear model comparison by sex of group mean standardized results with outcome help-seeking intentions (full-maximum-likelihood-estimation; index i: level 1-unit – survey participants, n=1630; index j: level-2-unit – lifestyles, m=9) ..... 9

Table S2.2: Hierarchical linear model comparison by age of group mean standardized results with outcome help-seeking intentions (full-maximum-likelihood-estimation; index i: level 1-unit – survey participants, n=1630; index j: level-2-unit – lifestyles, m=9) ..... 10

Table S2.3: Hierarchical linear model comparison by having a mental illness or not of group mean standardized results with outcome help-seeking intentions (full-maximum-likelihood-estimation; index i: level 1-unit – survey participants, n=1630; index j: level-2-unit – lifestyles, m=9)..... 11

Table S1: Sample characteristics for each lifestyle, frequencies by column (except for the distribution of lifestyle), the column „missings“ includes missing values for survey participants being not assigned to a lifestyle because of missing values in at least one domain

| Variables                                        | Descriptives |       | Total | Missings | Lifestyles <sup>a</sup> |       |       |       |       |       |       |       |       |
|--------------------------------------------------|--------------|-------|-------|----------|-------------------------|-------|-------|-------|-------|-------|-------|-------|-------|
|                                                  |              |       |       |          | 1                       | 2     | 3     | 4     | 5     | 6     | 7     | 8     | 9     |
| Sex                                              | Men          | N     | 749   | 33       | 51                      | 115   | 10    | 119   | 238   | 34    | 60    | 76    | 13    |
|                                                  |              | %     | 45.95 | 49.25    | 78.46                   | 52.27 | 43.48 | 57.21 | 38.20 | 37.78 | 63.16 | 39.58 | 27.66 |
| Sex                                              | Women        | N     | 881   | 34       | 14                      | 105   | 13    | 89    | 385   | 56    | 35    | 116   | 34    |
|                                                  |              | %     | 54.05 | 50.75    | 21.54                   | 47.73 | 56.52 | 42.79 | 61.80 | 62.22 | 36.84 | 60.42 | 72.34 |
| Sex                                              | Missings     | N     | 0     | 0        | 0                       | 0     | 0     | 0     | 0     | 0     | 0     | 0     | 0     |
|                                                  |              | %     | 0     | 0        | 0                       | 0     | 0     | 0     | 0     | 0     | 0     | 0     | 0     |
| Age                                              | Median       |       |       |          | 57                      | 58    | 61    | 53    | 63    | 70    | 58    | 64    | 71    |
|                                                  | M            |       | 60.60 | 63.54    | 55.63                   | 58.98 | 57.43 | 53.77 | 61.92 | 65.67 | 57.56 | 63.42 | 69.98 |
|                                                  | SD           |       | 12.71 | 14.81    | 11.42                   | 12.52 | 14.19 | 10.46 | 12.38 | 13.67 | 10.00 | 12.37 | 10.92 |
|                                                  | Range        |       | 36-93 | 37-91    | 37-82                   | 37-91 | 37-81 | 36-83 | 36-93 | 37-90 | 37-80 | 36-89 | 38-92 |
|                                                  | Missings     |       | 0     | 0        | 0                       | 0     | 0     | 0     | 0     | 0     | 0     | 0     | 0     |
| Having a mental illness                          | No (CID=0)   | N     | 1080  | 31       | 48                      | 131   | 25    | 140   | 414   | 85    | 55    | 116   | 35    |
|                                                  |              | %     | 66.26 | 46.27    | 75.00                   | 62.98 | 69.44 | 67.63 | 69.12 | 73.91 | 59.78 | 61.38 | 66.04 |
|                                                  | Yes (CID>0)  | N     | 534   | 26       | 16                      | 77    | 10    | 67    | 183   | 28    | 36    | 73    | 18    |
|                                                  |              | %     | 32.76 | 38.81    | 25.00                   | 37.02 | 27.78 | 32.37 | 30.55 | 24.35 | 39.13 | 38.62 | 33.96 |
|                                                  | Missings     | N     | 16    | 10       | 0                       | 0     | 1     | 0     | 2     | 2     | 1     | 0     | 0     |
|                                                  |              | %     | 0.98  | 14.93    | 0                       | 0     | 2.78  | 0     | 0.33  | 1.74  | 1.09  | 0     | 0     |
| Would you feel ashamed if you were mentally ill? | Median       |       | 2     | 1        | 2                       | 2     | 2     | 2     | 2     | 2     | 2     | 1-2   | 1     |
|                                                  | M            |       | 1.75  | 1.65     | 1.73                    | 1.80  | 1.83  | 1.85  | 1.73  | 1.81  | 1.75  | 1.69  | 1.65  |
|                                                  | SD           |       | 0.81  | 0.79     | 0.80                    | 0.86  | 0.85  | 0.83  | 0.78  | 0.79  | 0.83  | 0.84  | 0.86  |
|                                                  | Range        |       | 1-5   | 1-4      | 1-4                     | 1-4   | 1-4   | 1-5   | 1-4   | 1-4   | 1-4   | 1-5   | 1-4   |
|                                                  | Missings     |       | 4     |          |                         |       |       |       |       |       |       |       |       |
|                                                  | Not at all   | N     | 717   | 34       | 28                      | 96    | 9     | 78    | 270   | 37    | 44    | 96    | 25    |
|                                                  |              | %     | 43.99 | 50.75    | 43.08                   | 43.64 | 39.13 | 37.50 | 43.34 | 41.11 | 46.32 | 50.00 | 53.19 |
|                                                  | A little     | N     | 659   | 23       | 29                      | 80    | 12    | 97    | 266   | 36    | 36    | 68    | 12    |
|                                                  |              | %     | 40.43 | 34.33    | 44.62                   | 36.36 | 52.17 | 46.63 | 42.70 | 40.00 | 37.89 | 35.42 | 25.53 |
|                                                  | Moderately   | N     | 187   | 7        | 5                       | 32    | 2     | 22    | 67    | 13    | 11    | 21    | 7     |
| %                                                |              | 11.47 | 10.45 | 7.69     | 14.55                   | 9.70  | 10.58 | 10.75 | 14.44 | 11.58 | 10.94 | 14.89 |       |
| Much                                             | N            | 60    | 2     | 3        | 12                      | 0     | 10    | 19    | 4     | 4     | 4     | 2     |       |
|                                                  | %            | 3.68  | 2.99  | 4.62     | 5.45                    | 0     | 4.81  | 3.05  | 4.44  | 4.21  | 2.08  | 4.26  |       |
| Very much                                        | N            | 3     | 0     | 0        | 0                       | 0     | 1     | 0     | 0     | 0     | 2     | 0     |       |
|                                                  | %            | 0.18  | 0     | 0        | 0                       | 0     | 0.48  | 0     | 0     | 0     | 1.04  | 0     |       |
| Missings                                         | N            | 4     | 1     | 0        | 0                       | 0     | 0     | 1     | 0     | 0     | 1     | 1     |       |
|                                                  | %            | 0.24  | 1.49  | 0        | 0                       | 0     | 0     | 0.16  | 0     | 0     | 0.52  | 2.13  |       |

An Explorative Cross-Sectional Analysis of Mental-Health Shame and Help-Seeking-Intention in different Lifestyles

*Social Psychiatry und Psychiatric Epidemiology*

Claudia Helmert<sup>1</sup>, Toni Fleischer<sup>1</sup>, Sven Speerforck<sup>1</sup>, Christine Ulke<sup>1</sup>, Laura Altweck<sup>2</sup>, Stefanie Hahm<sup>2</sup>, Holger Mühlhan<sup>2</sup>, Silke Schmidt<sup>2</sup>, Hans J. Grabe<sup>3</sup>, Henry Völzke<sup>4</sup>, Georg Schomerus<sup>1</sup>

<sup>1</sup>Department of Psychiatry and Psychotherapy, University of Leipzig Medical Center, Leipzig, Germany

<sup>2</sup>Department of Health and Prevention, University of Greifswald, Greifswald, Germany

<sup>3</sup>Department of Psychiatry and Psychotherapy, Greifswald University, Medical Center, Greifswald, Germany

<sup>4</sup>Institute for Community Medicine, Greifswald University, Medical Center, Greifswald, Germany

\*Corresponding Author: Claudia Helmert, claudia.helmert@medizin.uni-leipzig.de

| Variables                                                                                                     | Descriptives    |        | Total  | Missings | Lifestyles <sup>a</sup> |        |        |        |        |        |        |        |        |
|---------------------------------------------------------------------------------------------------------------|-----------------|--------|--------|----------|-------------------------|--------|--------|--------|--------|--------|--------|--------|--------|
|                                                                                                               |                 |        |        |          | 1                       | 2      | 3      | 4      | 5      | 6      | 7      | 8      | 9      |
|                                                                                                               | N               |        | 1630   | 67       | 65                      | 220    | 23     | 208    | 623    | 90     | 95     | 192    | 47     |
|                                                                                                               | %               |        |        | 4.11     | 3.99                    | 13.50  | 1.41   | 12.76  | 38.22  | 5.52   | 5.83   | 11.78  | 2.88   |
| Would you seek professional help if you feel depressed for a long time or if you had other mental problems?   | Median          |        | 4      | 4        | 4                       | 4      | 4      | 4      | 4      | 4      | 4      | 5      | 5      |
|                                                                                                               | M               |        | 3.93   | 3.82     | 3.90                    | 4.07   | 3.5    | 3.87   | 4.00   | 3.69   | 3.70   | 3.98   | 3.98   |
|                                                                                                               | SD              |        | 1.18   | 1.40     | 1.16                    | 1.01   | 1.23   | 1.17   | 1.13   | 1.28   | 1.35   | 1.26   | 1.24   |
|                                                                                                               | Range           |        | 1-5    | 1-5      | 1-5                     | 1-5    | 1-5    | 1-5    | 1-5    | 1-5    | 1-5    | 1-5    | 1-5    |
|                                                                                                               | Missings        |        | 5      |          |                         |        |        |        |        |        |        |        |        |
| Definitely not                                                                                                | N               |        | 57     |          | 2                       | 1      | 2      | 7      | 17     | 6      | 6      | 9      | 1      |
|                                                                                                               | %               |        | 3.51   |          | 3.08                    | 0.45   | 8.70   | 3.37   | 2.73   | 6.67   | 6.32   | 4.69   | 2.13   |
| 2                                                                                                             | N               |        | 167    |          | 6                       | 19     | 3      | 23     | 52     | 14     | 14     | 20     | 8      |
|                                                                                                               | %               |        | 10.28  |          | 9.23                    | 8.64   | 13.04  | 11.06  | 8.35   | 15.56  | 14.74  | 10.42  | 17.02  |
| 3                                                                                                             | N               |        | 353    |          | 15                      | 49     | 5      | 44     | 138    | 22     | 24     | 37     | 9      |
|                                                                                                               | %               |        | 21.72  |          | 23.08                   | 22.27  | 21.74  | 21.15  | 22.15  | 24.44  | 25.56  | 19.27  | 19.15  |
| 4                                                                                                             | N               |        | 307    |          | 13                      | 54     | 7      | 48     | 125    | 16     | 9      | 22     | 4      |
|                                                                                                               | %               |        | 18.89  |          | 20.00                   | 24.55  | 30.43  | 23.08  | 20.06  | 17.78  | 9.47   | 11.46  | 8.51   |
| Definitely                                                                                                    | N               |        | 741    |          | 28                      | 97     | 6      | 86     | 291    | 32     | 42     | 103    | 24     |
|                                                                                                               | %               |        | 45.60  |          | 43.08                   | 44.09  | 26.07  | 41.35  | 46.71  | 35.56  | 44.21  | 53.65  | 51.06  |
| Missings                                                                                                      | N               |        | 5      |          | 1                       | 0      | 0      | 0      | 0      | 0      | 0      | 1      | 1      |
|                                                                                                               | %               |        | 0.30   |          | 1.54                    | 0      | 0      | 0      | 0      | 0      | 0      | 0.52   | 2.13   |
| Association of shame (Predictor) and help-seeking (outcome) (without recognizing hierarchical data structure) | b0              | Coeff. | 4.46   |          | 4.98                    | 4.52   | 3.87   | 4.31   | 4.58   | 4.59   | 3.97   | 4.11   | 4.83   |
|                                                                                                               |                 | P      | <0.001 |          | <0.001                  | <0.001 | <0.001 | <0.001 | <0.001 | <0.001 | <0.001 | <0.001 | <0.001 |
| r                                                                                                             | Coeff.          |        | -.31   |          | -.61                    | -.25   | -.2    | -.24   | -.34   | -.50   | -.16   | -.08   | -.51   |
|                                                                                                               | p               |        | <0.001 |          | 0.001                   | 0.002  | 0.42   | 0.01   | <0.001 | 0.001  | 0.35   | 0.48   | 0.01   |
| R <sup>2</sup> (adj.)                                                                                         |                 |        | 0.04   |          | 0.17                    | 0.04   | -0.01  | 0.02   | 0.05   | 0.09   | -0.002 | -0.003 | 0.11   |
| Endogenous : SES & Health status                                                                              |                 |        |        |          |                         |        |        |        |        |        |        |        |        |
| SES                                                                                                           |                 |        |        |          |                         |        |        |        |        |        |        |        |        |
| Income                                                                                                        | Less than 500 € | N      | 33     | 4        | 0                       | 0      | 0      | 0      | 0      | 0      | 7      | 21     | 1      |
|                                                                                                               |                 | %      | 2.02   | 5.97     | 0                       | 0      | 0      | 0      | 0      | 0      | 7.37   | 10.94  | 2.13   |
| 500-900 €                                                                                                     | N               | 107    | 2      | 0        | 0                       | 0      | 0      | 5      | 1      | 29     | 60     | 10     |        |
|                                                                                                               | %               | 6.56   | 2.99   | 0        | 0                       | 0      | 0      | 0.80   | 1.11   | 30.53  | 31.25  | 21.28  |        |
| 900-1300 €                                                                                                    | N               | 158    | 8      | 0        | 0                       | 0      | 10     | 52     | 2      | 19     | 50     | 17     |        |
|                                                                                                               | %               | 9.69   | 11.94  | 0        | 0                       | 0      | 4.81   | 8.35   | 2.22   | 20.00  | 26.04  | 36.17  |        |
| 1300-1800€                                                                                                    | N               | 318    | 9      | 1        | 7                       | 3      | 30     | 140    | 35     | 31     | 50     | 12     |        |
|                                                                                                               | %               | 19.51  | 13.43  | 1.54     | 3.18                    | 13.04  | 14.42  | 22.47  | 38.89  | 32.63  | 26.04  | 25.53  |        |
| 1800-2300€                                                                                                    | N               | 274    | 4      | 1        | 19                      | 2      | 64     | 157    | 17     | 3      | 5      | 2      |        |
|                                                                                                               | %               | 16.81  | 5.97   | 1.54     | 8.64                    | 8.70   | 30.77  | 25.20  | 18.89  | 3.16   | 2.60   | 4.26   |        |
| 2300-2800€                                                                                                    | N               | 215    | 3      | 9        | 37                      | 2      | 35     | 115    | 13     | 0      | 1      | 0      |        |
|                                                                                                               | %               | 13.19  | 4.48   | 13.85    | 16.82                   | 8.70   | 16.83  | 18.46  | 14.44  | 0      | 0.52   | 0      |        |

An Explorative Cross-Sectional Analysis of Mental-Health Shame and Help-Seeking-Intention in different Lifestyles

*Social Psychiatry und Psychiatric Epidemiology*

Claudia Helmert<sup>\*1</sup>, Toni Fleischer<sup>1</sup>, Sven Speerforck<sup>1</sup>, Christine Ulke<sup>1</sup>, Laura Altweck<sup>2</sup>, Stefanie Hahm<sup>2</sup>, Holger Mühlhan<sup>2</sup>, Silke Schmidt<sup>2</sup>, Hans J. Grabe<sup>3</sup>, Henry Völzke<sup>4</sup>, Georg Schomerus<sup>1</sup>

<sup>1</sup>Department of Psychiatry and Psychotherapy, University of Leipzig Medical Center, Leipzig, Germany

<sup>2</sup>Department of Health and Prevention, University of Greifswald, Greifswald, Germany

<sup>3</sup>Department of Psychiatry and Psychotherapy, Greifswald University, Medical Center, Greifswald, Germany

<sup>4</sup>Institute for Community Medicine, Greifswald University, Medical Center, Greifswald, Germany

\*Corresponding Author: Claudia Helmert, claudia.helmert@medizin.uni-leipzig.de

| Variables       | Descriptives                                                         | Total | Missings | Lifestyles <sup>a</sup> |       |       |       |       |      |      |       |       |
|-----------------|----------------------------------------------------------------------|-------|----------|-------------------------|-------|-------|-------|-------|------|------|-------|-------|
|                 |                                                                      |       |          | 1                       | 2     | 3     | 4     | 5     | 6    | 7    | 8     | 9     |
|                 | N                                                                    | 1630  | 67       | 65                      | 220   | 23    | 208   | 623   | 90   | 95   | 192   | 47    |
|                 | %                                                                    |       | 4.11     | 3.99                    | 13.50 | 1.41  | 12.76 | 38.22 | 5.52 | 5.83 | 11.78 | 2.88  |
| 2800-3300€      | N                                                                    | 165   | 4        | 14                      | 42    | 5     | 30    | 63    | 7    | 0    | 0     | 0     |
|                 | %                                                                    | 10.12 | 5.97     | 21.54                   | 19.09 | 21.74 | 14.42 | 10.11 | 7.78 | 0    | 0     | 0     |
| 3300-3800€      | N                                                                    | 101   | 6        | 11                      | 24    | 5     | 16    | 33    | 6    | 0    | 0     | 0     |
|                 | %                                                                    | 6.20  | 8.96     | 16.92                   | 10.91 | 21.74 | 7.69  | 5.30  | 6.67 | 0    | 0     | 0     |
| 3800-4300€      | N                                                                    | 73    | 5        | 8                       | 30    | 0     | 12    | 15    | 3    | 0    | 0     | 0     |
|                 | %                                                                    | 4.48  | 7.46     | 12.31                   | 13.64 | 0     | 5.77  | 2.41  | 3.33 | 0    | 0     | 0     |
| 4300-4800€      | N                                                                    | 45    | 1        | 9                       | 13    | 3     | 4     | 14    | 2    | 0    | 0     | 0     |
|                 | %                                                                    | 2.76  | 1.49     | 13.85                   | 5.91  | 8.70  | 1.92  | 2.25  | 2.22 | 0    | 0     | 0     |
| 4800-5300€      | N                                                                    | 35    | 1        | 4                       | 18    | 0     | 4     | 8     | 0    | 0    | 0     | 0     |
|                 | %                                                                    | 2.15  | 1.49     | 6.15                    | 8.18  | 0     | 1.92  | 1.28  | 0    | 0    | 0     | 0     |
| 5300-5800€      | N                                                                    | 15    | 0        | 3                       | 8     | 1     | 1     | 2     | 0    | 0    | 0     | 0     |
|                 | %                                                                    | 0.92  | 0        | 4.62                    | 3.64  | 4.35  | 0.48  | 0.32  | 0    | 0    | 0     | 0     |
| 5800-6300€      | N                                                                    | 10    | 0        | 2                       | 4     | 1     | 1     | 2     | 0    | 0    | 0     | 0     |
|                 | %                                                                    | 0.61  | 0        | 3.08                    | 1.82  | 4.35  | 0.48  | 0.32  | 0    | 0    | 0     | 0     |
| 6300-7800€      | N                                                                    | 13    | 2        | 1                       | 5     | 2     | 0     | 3     | 0    | 0    | 0     | 0     |
|                 | %                                                                    | 0.80  | 2.99     | 1.54                    | 2.27  | 8.70  | 0     | 0.48  | 0    | 0    | 0     | 0     |
| More than 7800€ | N                                                                    | 9     | 0        | 1                       | 6     | 0     | 0     | 1     | 1    | 0    | 0     | 0     |
|                 | %                                                                    | 0.55  | 0        | 1.54                    | 2.73  | 0     | 0     | 0.16  | 1.11 | 0    | 0     | 0     |
| Missings        | N                                                                    | 59    | 18       | 1                       | 7     | 0     | 1     | 13    | 0    | 6    | 5     | 5     |
|                 | %                                                                    | 1.04  | 27.06    | 1.54                    | 3.18  | 0     | 0.48  | 2.09  | 0    | 6.32 | 2.60  | 10.64 |
| Profession      | Self-employed farmer                                                 | N     | 2        | 0                       | 0     | 0     | 0     | 1     | 0    | 0    | 1     | 0     |
|                 | %                                                                    | 0.12  | 0        | 0                       | 0     | 0     | 0     | 0.16  | 0    | 0    | 0.52  | 0     |
|                 | Academic freelancer                                                  | N     | 29       | 1                       | 4     | 20    | 2     | 2     | 0    | 0    | 0     | 0     |
|                 | %                                                                    | 1.78  | 1.49     | 6.15                    | 9.09  | 8.70  | 0     | 0.32  | 0    | 0    | 0     | 0     |
|                 | Other self-employed up to 9 employees                                | N     | 82       | 2                       | 12    | 23    | 2     | 26    | 2    | 3    | 1     | 0     |
|                 | %                                                                    | 5.03  | 2.99     | 18.46                   | 10.45 | 8.70  | 5.29  | 4.17  | 2.22 | 3.16 | 0.52  | 0     |
|                 | Other self-employed more than 9 employees                            | N     | 5        | 0                       | 0     | 1     | 0     | 3     | 1    | 0    | 0     | 0     |
|                 | %                                                                    | 0.31  | 0        | 0                       | 0.45  | 0     | 0     | 0.48  | 1.11 | 0    | 0     | 0     |
|                 | Civil servants, judge, professional soldier (ordinary civil service) | N     | 5        | 1                       | 0     | 0     | 2     | 2     | 0    | 0    | 0     | 0     |
|                 | %                                                                    | 0.31  | 1.49     | 0                       | 0     | 0     | 0.96  | 0.32  | 0    | 0    | 0     | 0     |
|                 | Civil servants, judge, professional soldier (middle civil service)   | N     | 21       | 0                       | 3     | 3     | 0     | 5     | 9    | 1    | 0     | 0     |
|                 | %                                                                    | 1.29  | 0        | 4.62                    | 1.36  | 0     | 2.40  | 1.44  | 1.11 | 0    | 0     | 0     |

An Explorative Cross-Sectional Analysis of Mental-Health Shame and Help-Seeking-Intention in different Lifestyles

*Social Psychiatry und Psychiatric Epidemiology*

Claudia Helmert<sup>\*1</sup>, Toni Fleischer<sup>1</sup>, Sven Speerforck<sup>1</sup>, Christine Ulke<sup>1</sup>, Laura Altweck<sup>2</sup>, Stefanie Hahm<sup>2</sup>, Holger Mühlhan<sup>2</sup>, Silke Schmidt<sup>2</sup>, Hans J. Grabe<sup>3</sup>, Henry Völzke<sup>4</sup>, Georg Schomerus<sup>1</sup>

<sup>1</sup>Department of Psychiatry and Psychotherapy, University of Leipzig Medical Center, Leipzig, Germany

<sup>2</sup>Department of Health and Prevention, University of Greifswald, Greifswald, Germany

<sup>3</sup>Department of Psychiatry and Psychotherapy, Greifswald University, Medical Center, Greifswald, Germany

<sup>4</sup>Institute for Community Medicine, Greifswald University, Medical Center, Greifswald, Germany

\*Corresponding Author: Claudia Helmert, claudia.helmert@medizin.uni-leipzig.de

| Variables       | Descriptives | Total | Missings | Lifestyles <sup>a</sup> |       |       |       |       |       |       |       |       |
|-----------------|--------------|-------|----------|-------------------------|-------|-------|-------|-------|-------|-------|-------|-------|
|                 |              |       |          | 1                       | 2     | 3     | 4     | 5     | 6     | 7     | 8     | 9     |
|                 | N            | 1630  | 67       | 65                      | 220   | 23    | 208   | 623   | 90    | 95    | 192   | 47    |
|                 | %            |       | 4.11     | 3.99                    | 13.50 | 1.41  | 12.76 | 38.22 | 5.52  | 5.83  | 11.78 | 2.88  |
|                 | N            | 17    | 2        | 4                       | 9     | 0     | 0     | 1     | 1     | 0     | 0     | 0     |
|                 | %            | 1.04  | 2.99     | 6.15                    | 4.09  | 0     | 0     | 0.16  | 1.11  | 0     | 0     | 0     |
|                 | N            | 6     | 0        | 2                       | 4     | 0     | 0     | 0     | 0     | 0     | 0     | 0     |
|                 | %            | 0.37  | 0        | 3.08                    | 1.82  | 0     | 0     | 0     | 0     | 0     | 0     | 0     |
|                 | N            | 107   | 3        | 0                       | 0     | 0     | 11    | 33    | 2     | 15    | 36    | 7     |
|                 | %            | 6.56  | 4.48     | 0                       | 0     | 0     | 5.29  | 5.30  | 2.22  | 15.79 | 18.75 | 14.89 |
|                 | N            | 422   | 20       | 3                       | 16    | 3     | 64    | 226   | 35    | 10    | 29    | 16    |
|                 | %            | 25.89 | 29.85    | 4.62                    | 7.27  | 13.04 | 30.77 | 36.28 | 38.89 | 10.53 | 15.10 | 34.04 |
|                 | N            | 470   | 13       | 26                      | 105   | 14    | 51    | 216   | 28    | 1     | 14    | 2     |
|                 | %            | 28.83 | 19.40    | 40.00                   | 47.73 | 60.87 | 24.52 | 34.67 | 31.11 | 1.05  | 7.29  | 4.26  |
|                 | N            | 97    | 3        | 10                      | 37    | 2     | 3     | 32    | 7     | 0     | 3     | 0     |
|                 | %            | 5.95  | 4.48     | 15.38                   | 16.82 | 8.70  | 1.44  | 5.14  | 7.78  | 0     | 1.56  | 0     |
|                 | N            | 39    | 3        | 0                       | 0     | 0     | 2     | 3     | 0     | 7     | 20    | 4     |
|                 | %            | 2.39  | 4.48     | 0                       | 0     | 0     | 0.96  | 0.48  | 0     | 7.37  | 10.42 | 8.51  |
|                 | N            | 45    | 3        | 0                       | 0     | 0     | 5     | 1     | 1     | 10    | 21    | 4     |
|                 | %            | 2.76  | 4.48     | 0                       | 0     | 0     | 2.40  | 0.16  | 1.11  | 10.53 | 10.94 | 8.51  |
|                 | N            | 230   | 14       | 0                       | 0     | 0     | 48    | 53    | 7     | 43    | 54    | 11    |
|                 | %            | 14.11 | 20.90    | 0                       | 0     | 0     | 23.08 | 8.51  | 7.78  | 45.26 | 28.13 | 23.40 |
|                 | N            | 45    | 2        | 0                       | 0     | 0     | 6     | 14    | 4     | 5     | 11    | 3     |
|                 | %            | 2.76  | 2.99     | 0                       | 0     | 0     | 2.88  | 2.25  | 4.44  | 5.26  | 5.73  | 6.38  |
|                 | N            | 8     | 0        | 1                       | 2     | 0     | 0     | 1     | 1     | 1     | 2     | 0     |
|                 | %            | 0.49  | 0        | 1.54                    | 0.91  | 0     | 0     | 0.16  | 1.11  | 1.05  | 1.04  | 0     |
| Education level | N            | 19    | 1        | 0                       | 0     | 0     | 1     | 3     | 2     | 2     | 6     | 4     |
|                 | %            | 1.17  | 1.49     | 0                       | 0     | 0     | 0.48  | 0.48  | 2.22  | 2.11  | 3.13  | 8.51  |
|                 | N            | 398   | 24       | 0                       | 1     | 0     | 25    | 146   | 26    | 42    | 101   | 33    |
|                 | %            | 24.42 | 35.82    | 0                       | 0.45  | 0     | 12.02 | 23.43 | 28.89 | 44.21 | 52.60 | 70.21 |
|                 | N            | 841   | 31       | 16                      | 31    | 1     | 171   | 402   | 52    | 47    | 80    | 10    |
|                 | %            | 51.60 | 46.27    | 24.62                   | 14.09 | 4.35  | 82.21 | 64.53 | 57.78 | 49.47 | 41.67 | 12.28 |

An Explorative Cross-Sectional Analysis of Mental-Health Shame and Help-Seeking-Intention in different Lifestyles

*Social Psychiatry und Psychiatric Epidemiology*

Claudia Helmert<sup>\*1</sup>, Toni Fleischer<sup>1</sup>, Sven Speerforck<sup>1</sup>, Christine Ulke<sup>1</sup>, Laura Altweck<sup>2</sup>, Stefanie Hahm<sup>2</sup>, Holger Mühlhan<sup>2</sup>, Silke Schmidt<sup>2</sup>, Hans J. Grabe<sup>3</sup>, Henry Völzke<sup>4</sup>, Georg Schomerus<sup>1</sup>

<sup>1</sup>Department of Psychiatry and Psychotherapy, University of Leipzig Medical Center, Leipzig, Germany

<sup>2</sup>Department of Health and Prevention, University of Greifswald, Greifswald, Germany

<sup>3</sup>Department of Psychiatry and Psychotherapy, Greifswald University, Medical Center, Greifswald, Germany

<sup>4</sup>Institute for Community Medicine, Greifswald University, Medical Center, Greifswald, Germany

\*Corresponding Author: Claudia Helmert, claudia.helmert@medizin.uni-leipzig.de

| Variables                                                               | Descriptives | Total | Missings | Lifestyles <sup>a</sup> |       |       |       |       |       |       |       |       |
|-------------------------------------------------------------------------|--------------|-------|----------|-------------------------|-------|-------|-------|-------|-------|-------|-------|-------|
|                                                                         |              |       |          | 1                       | 2     | 3     | 4     | 5     | 6     | 7     | 8     | 9     |
|                                                                         | N            | 1630  | 67       | 65                      | 220   | 23    | 208   | 623   | 90    | 95    | 192   | 47    |
|                                                                         | %            |       | 4.11     | 3.99                    | 13.50 | 1.41  | 12.76 | 38.22 | 5.52  | 5.83  | 11.78 | 2.88  |
|                                                                         | N            | 34    | 2        | 4                       | 10    | 4     | 2     | 11    | 0     | 1     | 0     | 0     |
| Technical college graduation                                            | %            | 2.09  | 2.99     | 6.15                    | 4.55  | 17.39 | 0.96  | 1.77  | 0     | 1.05  | 0     | 0     |
|                                                                         | N            | 330   | 8        | 45                      | 177   | 17    | 9     | 59    | 9     | 2     | 4     | 0     |
| (Extended) High school graduation                                       | %            | 20.25 | 11.94    | 69.23                   | 80.45 | 73.91 | 4.33  | 9.47  | 10.00 | 2.11  | 2.08  | 0     |
|                                                                         | N            | 7     | 1        | 0                       | 1     | 1     | 0     | 2     | 0     | 1     | 1     | 0     |
| Other school diploma                                                    | %            | 0.43  | 1.49     | 0                       | 0.45  | 4.35  | 0     | 0.32  | 0     | 1.05  | 0.52  | 0     |
|                                                                         | N            | 1     | 0        | 0                       | 0     | 0     | 0     | 0     | 1     | 0     | 0     | 0     |
| Missings                                                                | %            | 0.06  | 0        | 0                       | 0     | 0     | 0     | 0     | 1.11  | 0     | 0     | 0     |
|                                                                         | N            | 8     | 0        | 2                       | 1     | 0     | 1     | 2     | 0     | 1     | 1     | 0     |
| In vocational training / pupil / student                                | %            | 0.49  | 0        | 3.08                    | 0.45  | 0     | 0.48  | 0.32  | 0     | 1.05  | 0.52  | 0     |
|                                                                         | N            | 50    | 3        | 0                       | 0     | 0     | 0     | 3     | 1     | 8     | 24    | 11    |
| No educational qualification / part-skilled worker                      | %            | 3.07  | 4.48     | 0                       | 0     | 0     | 0     | 0.48  | 1.11  | 8.42  | 12.50 | 23.40 |
|                                                                         | N            | 735   | 39       | 10                      | 20    | 4     | 112   | 280   | 37    | 73    | 133   | 27    |
| Skilled worker / apprenticeship with degree                             | %            | 45.09 | 58.21    | 15.38                   | 9.09  | 17.39 | 54.33 | 44.94 | 41.11 | 76.84 | 69.27 | 57.45 |
|                                                                         | N            | 131   | 5        | 2                       | 8     | 1     | 23    | 64    | 8     | 8     | 9     | 3     |
| Apprenticeship master / technician                                      | %            | 8.04  | 7.46     | 3.08                    | 3.64  | 4.35  | 11.06 | 10.27 | 8.89  | 8.42  | 4.69  | 6.38  |
|                                                                         | N            | 45    | 2        | 3                       | 0     | 0     | 9     | 21    | 4     | 1     | 5     | 6     |
| Professional / business school                                          | %            | 2.76  | 2.99     | 4.62                    | 0     | 0     | 4.33  | 3.37  | 4.44  | 1.05  | 2.60  | 12.77 |
|                                                                         | N            | 408   | 9        | 23                      | 48    | 5     | 55    | 210   | 32    | 3     | 17    | 0     |
| Technical (high) school degree                                          | %            | 25.03 | 13.43    | 35.38                   | 21.82 | 21.74 | 26.44 | 33.71 | 35.56 | 3.16  | 8.85  | 0     |
|                                                                         | N            | 252   | 8        | 25                      | 143   | 12    | 8     | 43    | 7     | 1     | 3     | 0     |
| High school degree                                                      | %            | 15.46 | 13.43    | 38.46                   | 65.00 | 56.52 | 3.85  | 6.90  | 7.78  | 1.05  | 1.56  | 0     |
|                                                                         | N            | 1     | 0        | 0                       | 0     | 0     | 0     | 0     | 1     | 0     | 0     | 0     |
| Missings                                                                | %            | 0.06  | 0        | 0                       | 0     | 0     | 0     | 0     | 1.11  | 0     | 0     | 0     |
| <i>Health status</i>                                                    |              |       |          |                         |       |       |       |       |       |       |       |       |
|                                                                         | N            | 1330  | 18       | 42                      | 215   | 23    | 103   | 580   | 90    | 45    | 167   | 47    |
| Smokers                                                                 | %            | 81.60 | 26.87    | 64.62                   | 97.73 | 100   | 49.52 | 93.10 | 100   | 47.37 | 86.98 | 100   |
|                                                                         | N            | 285   | 34       | 23                      | 5     | 0     | 105   | 43    | 0     | 50    | 25    | 0     |
| Yes                                                                     | %            | 17.48 | 50.75    | 35.38                   | 2.27  | 0     | 50.48 | 6.90  | 0     | 52.63 | 13.02 | 0     |
|                                                                         | N            | 15    | 15       | 0                       | 0     | 0     | 0     | 0     | 0     | 0     | 0     | 0     |
| Missings                                                                | %            | 0.92  | 22.38    | 0                       | 0     | 0     | 0     | 0     | 0     | 0     | 0     | 0     |
|                                                                         | M            | 1.02  | 0.65     | 2.54                    | 0.44  | 0     | 2.83  | 0.26  | 0     | 3.66  | 0.28  | 0     |
| Alcohol (including people who are not drinking „0“ part of the average) |              |       |          |                         |       |       |       |       |       |       |       |       |
|                                                                         | M            |       |          |                         |       |       |       |       |       |       |       |       |

An Explorative Cross-Sectional Analysis of Mental-Health Shame and Help-Seeking-Intention in different Lifestyles

*Social Psychiatry and Psychiatric Epidemiology*

Claudia Helmert<sup>1</sup>, Toni Fleischer<sup>1</sup>, Sven Speerforck<sup>1</sup>, Christine Ulke<sup>1</sup>, Laura Altweck<sup>2</sup>, Stefanie Hahm<sup>2</sup>, Holger Mühlen<sup>2</sup>, Silke Schmidt<sup>2</sup>, Hans J. Grabe<sup>3</sup>, Henry Völzke<sup>4</sup>, Georg Schomerus<sup>1</sup>

<sup>1</sup>Department of Psychiatry and Psychotherapy, University of Leipzig Medical Center, Leipzig, Germany

<sup>2</sup>Department of Health and Prevention, University of Greifswald, Greifswald, Germany

<sup>3</sup>Department of Psychiatry and Psychotherapy, Greifswald University, Medical Center, Greifswald, Germany

<sup>4</sup>Institute for Community Medicine, Greifswald University, Medical Center, Greifswald, Germany

\*Corresponding Author: Claudia Helmert, claudia.helmert@medizin.uni-leipzig.de

| Variables                                                                  | Descriptives        | Total      | Missings    | Lifestyles <sup>a</sup> |            |             |              |             |             |              |             |             |
|----------------------------------------------------------------------------|---------------------|------------|-------------|-------------------------|------------|-------------|--------------|-------------|-------------|--------------|-------------|-------------|
|                                                                            |                     |            |             | 1                       | 2          | 3           | 4            | 5           | 6           | 7            | 8           | 9           |
|                                                                            | N                   | 1630       | 67          | 65                      | 220        | 23          | 208          | 623         | 90          | 95           | 192         | 47          |
|                                                                            | %                   |            | 4.11        | 3.99                    | 13.50      | 1.41        | 12.76        | 38.22       | 5.52        | 5.83         | 11.78       | 2.88        |
| Month                                                                      | SD                  | 3.02       |             | 4.46                    | 1.48       | 0           | 4.40         | 1.29        | 0           | 6.06         | 1.45        | 0           |
|                                                                            | Range               | 0-30       | 0-4         | 0-30                    | 0-15       | 0           | 0-30         | 0-20        | 0           | 0-30         | 0-15        | 0           |
|                                                                            | Not drinking (N, %) | 251 (15.0) | 36 (54.0)   | 0                       | 9 (4.0)    | 18 (78.0)   | 0            | 44 (7.0)    | 72 (80.0)   | 0            | 38 (20.0)   | 34 (72)     |
| Average quantity of alcohol (g) per day when drinking beer                 | M                   | 28.36      | 33.73       | 35.44                   | 23.12      | 0           | 39.74        | 22.64       | -           | 41.77        | 24.32       | -           |
|                                                                            | SD                  | 19.46      | 24.75       | 19.59                   | 11.31      | 0           | 25.01        | 13.64       | -           | 27.53        | 14.65       | -           |
|                                                                            | Range               | 0-153.6    | 0-96        | 12.67-96                | 12.67-57.6 | 0           | 0-153.6      | 0-115.2     | -           | 12.7-115.2   | 12.7-96.0   | -           |
| Not drinking (N, %)                                                        | 776 (48.0)          | 49 (73.0)  | 12 (18.0)   | 82 (37.0)               | 22 (96.0)  | 58 (28.0)   | 286 (46.0)   | 90 (100)    | 30 (32.0)   | 100 (52.0)   | 47 (100)    |             |
| Average quantity of alcohol (g) per day when drinking wine                 | M                   | 33.60      | 37.50       | 34.18                   | 31.00      | 5.87        | 39.77        | 32.10       | -           | 42.45        | 32.88       | 4.4         |
|                                                                            | SD                  | 15.02      | 14.34       | 16.10                   | 13.04      | 5.08        | 19.34        | 12.89       | -           | 19.34        | 13.76       | 6.2         |
|                                                                            | Range               | 0-105.6    | 17.6-70.4   | 8.8-105.6               | 17.6-88.0  | 0-8.8       | 8.8-88.0     | 8.8-88.0    | -           | 17.6-88.0    | 17.6-70.4   | 0-8.8       |
| Not drinking (N, %)                                                        | 637 (39.0)          | 44 (66.0)  | 22 (34.0)   | 42 (19.0)               | 20 (87.0)  | 79 (38.0)   | 173 (28.0)   | 90 (100)    | 44 (46.0)   | 78 (41.0)    | 45 (96.0)   |             |
| Average quantity of alcohol (g) per day when drinking spirituous beverages | M                   | 18.98      | 27.57       | 22.79                   | 14.00      | 2.64        | 31.39        | 14.37       | 8.16        | 28.94        | 14.94       | 8.21        |
|                                                                            | SD                  | 18.16      | 21.08       | 15.37                   | 12.13      | 3.73        | 28.09        | 10.93       | 2.76        | 20.52        | 10.58       | 2.78        |
|                                                                            | Range               | 0-179.52   | 5.28-63.36  | 5.28-84.48              | 0-73.92    | 0-5.28      | 5.28-179.52  | 0-73.92     | 5.28-10.56  | 0-105.6      | 0-52.8      | 5.28-10.56  |
| Not drinking (N, %)                                                        | 1045 (64.0)         | 58 (87.0)  | 24 (37.0)   | 131 (60.0)              | 21 (91.0)  | 99 (48.0)   | 401 (64.0)   | 79 (88.0)   | 49 (52.0)   | 145 (76.0)   | 38 (81.0)   |             |
| Average quantity of alcohol (g) per day when drinking mixed beverages      | M                   | 20.35      | 17.16       | 22.88                   | 15.39      | 10.56       | 29.61        | 17.15       | 10.56       | 33.94        | 19.56       | 7.04        |
|                                                                            | SD                  | 14.19      | 7.86        | 17.09                   | 10.03      | -           | 18.31        | 7.14        | 0           | 26.58        | 12.32       | 6.10        |
|                                                                            | Range               | 0-105.6    | 10.56-31.68 | 10.56-84.48             | 0-52.8     | 10.56-10.56 | 10.56-84.48  | 10.56-42.24 | 10.56-10.56 | 10.56-105.6  | 10.56-63.36 | 10.56-31.68 |
| Not drinking (N, %)                                                        | 1370 (84.0)         | 59 (88.0)  | 47 (72.0)   | 185 (84.0)              | 22 (96.0)  | 162 (78.0)  | 522 (84.0)   | 83 (92.0)   | 81 (85.0)   | 165 (86.0)   | 44 (94.0)   |             |
| Average quantity of alcohol (g) per day when drinking alcohol              | M                   | 45.38      | 27.69       | 72.22                   | 47.69      | 1.45        | 76.32        | 43.32       | 1.82        | 68.93        | 37.59       | 2.21        |
|                                                                            | SD                  | 37.38      | 40.01       | 38.77                   | 28.19      | 3.34        | 44.00        | 28.35       | 3.81        | 42.57        | 31.52       | 4.01        |
|                                                                            | Range               | 0-251.52   | 0-148.8     | 17.6-226.56             | 0-186.24   | 0-10.56     | 12.67-251.52 | 0-201.92    | 0-10.56     | 12.67-187.97 | 0-187.97    | 0-10.56     |
| Not drinking (N, %)                                                        | 252 (15.46)         | 37 (55.22) | 0           | 9 (4.09)                | 19 (82.61) | 0           | 44 (7.06)    | 72 (80.00)  | 0           | 36 (18.75)   | 35 (74.47)  |             |

An Explorative Cross-Sectional Analysis of Mental-Health Shame and Help-Seeking-Intention in different Lifestyles

*Social Psychiatry und Psychiatric Epidemiology*

Claudia Helmert<sup>\*1</sup>, Toni Fleischer<sup>1</sup>, Sven Speerforck<sup>1</sup>, Christine Ulke<sup>1</sup>, Laura Altweck<sup>2</sup>, Stefanie Hahm<sup>2</sup>, Holger Mühlen<sup>2</sup>, Silke Schmidt<sup>2</sup>, Hans J. Grabe<sup>3</sup>, Henry Völzke<sup>4</sup>, Georg Schomerus<sup>1</sup>

<sup>1</sup>Department of Psychiatry and Psychotherapy, University of Leipzig Medical Center, Leipzig, Germany

<sup>2</sup>Department of Health and Prevention, University of Greifswald, Greifswald, Germany

<sup>3</sup>Department of Psychiatry and Psychotherapy, Greifswald University, Medical Center, Greifswald, Germany

<sup>4</sup>Institute for Community Medicine, Greifswald University, Medical Center, Greifswald, Germany

\*Corresponding Author: Claudia Helmert, claudia.helmert@medizin.uni-leipzig.de

| Variables         | Descriptives                                         | Total | Missings | Lifestyles <sup>a</sup> |       |       |       |       |       |       |       |       |       |
|-------------------|------------------------------------------------------|-------|----------|-------------------------|-------|-------|-------|-------|-------|-------|-------|-------|-------|
|                   |                                                      |       |          | 1                       | 2     | 3     | 4     | 5     | 6     | 7     | 8     | 9     |       |
|                   | N                                                    | 1630  | 67       | 65                      | 220   | 23    | 208   | 623   | 90    | 95    | 192   | 47    |       |
|                   | %                                                    |       | 4.11     | 3.99                    | 13.50 | 1.41  | 12.76 | 38.22 | 5.52  | 5.83  | 11.78 | 2.88  |       |
| Physical activity | Much more physically active than other people my age | N     | 26       | 2                       | 0     | 7     | 0     | 1     | 11    | 3     | 0     | 2     |       |
|                   |                                                      | %     | 1.60     | 2.99                    | 0     | 3.18  | 0     | 0.48  | 1.77  | 3.33  | 0     | 1.04  | 0     |
|                   | More physically active than other people my age      | N     | 419      | 10                      | 1     | 86    | 7     | 7     | 215   | 28    | 4     | 48    | 13    |
|                   |                                                      | %     | 25.71    | 14.93                   | 1.54  | 39.09 | 30.43 | 3.37  | 34.51 | 31.11 | 4.21  | 25.00 | 27.66 |
|                   | As physically active as other people my age          | N     | 850      | 30                      | 47    | 97    | 16    | 136   | 286   | 59    | 61    | 84    | 34    |
|                   |                                                      | %     | 52.15    | 44.78                   | 72.31 | 44.09 | 69.57 | 65.38 | 45.91 | 65.56 | 64.21 | 43.75 | 72.34 |
|                   | Less physically active than other people my age      | N     | 263      | 14                      | 16    | 24    | 0     | 52    | 93    | 0     | 22    | 42    | 0     |
|                   |                                                      | %     | 16.13    | 20.90                   | 24.52 | 10.91 | 0     | 25.00 | 14.93 | 0     | 23.16 | 21.88 | 0     |
|                   | Much less physically active than other people my age | N     | 66       | 5                       | 1     | 6     | 0     | 12    | 18    | 0     | 8     | 16    | 0     |
|                   |                                                      | %     | 4.05     | 7.46                    | 1.54  | 2.73  | 0     | 5.77  | 2.89  | 0     | 8.42  | 8.33  | 0     |
|                   | Missings                                             | N     | 6        | 6                       | 0     | 0     | 0     | 0     | 0     | 0     | 0     | 0     | 0     |
|                   |                                                      | %     | 0.37     | 8.96                    | 0     | 0     | 0     | 0     | 0     | 0     | 0     | 0     | 0     |

<sup>a</sup> Lifestyles: 1 – high SES, unhealthy; 2 – high SES, moderately healthy; 3 – high SES, healthy; 4 – middle SES, unhealthy; 5 middle SES, moderately healthy; 6 - middle SES, healthy; 7 – low SES, unhealthy; 8 – low SES, moderately health; 9 – low SES, healthy



Table S2.1: Hierarchical linear model comparison by sex of group mean standardized results with outcome help-seeking intentions (full-maximum-likelihood-estimation; index i: level 1-unit – survey participants, n=1630; index j: level-2-unit – lifestyles, m=9)

| Model                                                                       | I: Intercept- only (Null Model)     |                      |       |                      |       |                      | II: Random-Intercept                                        |                      |        |                      |        |                      | III: Random-intercept & random Slope                                           |                      |        |                  |        |                  |        |
|-----------------------------------------------------------------------------|-------------------------------------|----------------------|-------|----------------------|-------|----------------------|-------------------------------------------------------------|----------------------|--------|----------------------|--------|----------------------|--------------------------------------------------------------------------------|----------------------|--------|------------------|--------|------------------|--------|
| Help seeking <sub>ij</sub> =                                                | $\theta_0 + u_{0i} + \epsilon_{ij}$ |                      |       |                      |       |                      | $\theta_0 + \theta_{1j}shame_{ij} + u_{0i} + \epsilon_{ij}$ |                      |        |                      |        |                      | $\theta_0 + \theta_{1j}shame_{ij} + u_{0i} + u_{1j}shame_{ij} + \epsilon_{ij}$ |                      |        |                  |        |                  |        |
|                                                                             | overall                             |                      | Men   |                      | Women |                      | overall                                                     |                      | Men    |                      | Women  |                      | overall                                                                        |                      | Men    |                  | Women  |                  |        |
|                                                                             | Coeff                               | SE                   | Coeff | SE                   | Coeff | SE                   | Coeff                                                       | SE                   | Coeff  | SE                   | Coeff  | SE                   | Coeff                                                                          | SE                   | Coeff  | SE               | Coeff  | SE               |        |
| <b>Fixed Effects</b>                                                        |                                     |                      |       |                      |       |                      |                                                             |                      |        |                      |        |                      |                                                                                |                      |        |                  |        |                  |        |
| Intercept                                                                   | $\beta_0$                           |                      |       |                      |       |                      |                                                             |                      |        |                      |        |                      |                                                                                |                      |        |                  |        |                  |        |
|                                                                             | ≈0                                  | 0.025                | -.130 | .043                 | .120  | .033                 | .0001                                                       | .025                 | -.115  | .043                 | .110   | .032                 | .0001                                                                          | .025                 | -.109* | .047             | .110   | .032             |        |
|                                                                             |                                     |                      | ***   |                      | ***   |                      |                                                             |                      | **     |                      | ***    |                      |                                                                                |                      |        |                  | ***    |                  |        |
|                                                                             | $\beta_{1j}$                        | Shame                |       |                      |       |                      | -.208                                                       | .025                 | -.225  | .037                 | -.178  | .033                 | -.206                                                                          | .028                 | -.244  | .045             | -.178  | .033             |        |
|                                                                             |                                     |                      |       |                      |       |                      | ***                                                         |                      | ***    |                      | ***    |                      | ***                                                                            |                      | ***    |                  | ***    |                  |        |
| <b>Random Effects</b>                                                       |                                     |                      |       |                      |       |                      |                                                             |                      |        |                      |        |                      |                                                                                |                      |        |                  |        |                  |        |
|                                                                             |                                     | Est.                 | SE    | Est.                 | SE    | Est.                 | SE                                                          | Est.                 | SE     | Est.                 | SE     | Est.                 | SE                                                                             | Est.                 | SE     | Est.             | SE     | Est.             | SE     |
|                                                                             | $u^2_{0i}$                          | ≈0                   | ≈0    | .003                 | .006  | ≈0                   | ≈0                                                          | ≈0                   | ≈0     | .003                 | .006   | ≈0                   | ≈0                                                                             | ≈0                   | -      | .006             | .008   | ≈0               | -      |
|                                                                             | $u^2_{1j}$                          |                      |       |                      |       |                      |                                                             |                      |        |                      |        |                      |                                                                                | .001                 | -      | .004             | .008   | ≈0               | -      |
| Variance residuals/overall error term                                       | $\epsilon_{ij}$                     |                      |       |                      |       |                      |                                                             |                      |        |                      |        |                      |                                                                                |                      |        |                  |        |                  |        |
|                                                                             |                                     | .994                 | 0.036 | 1.051                | .056  | .913                 | .044                                                        | .952                 | 0.034  | .999                 | .053   | .883                 | .043                                                                           | .951                 | -      | .993             | .053   | .883             | -      |
|                                                                             | cov                                 |                      |       |                      |       |                      |                                                             |                      |        |                      |        |                      |                                                                                | ≈0                   | -      | -.005            | .006   | ≈0               | -      |
| Intraclass correlation                                                      | ICC                                 | SE                   | ICC   | SE                   | ICC   | SE                   |                                                             |                      |        |                      |        |                      |                                                                                |                      |        |                  |        |                  |        |
|                                                                             |                                     | ≈0                   | 0     | .002                 | .006  | ≈0                   | 0                                                           |                      |        |                      |        |                      |                                                                                |                      |        |                  |        |                  |        |
|                                                                             |                                     | Chi bar <sup>2</sup> | p     | Chi bar <sup>2</sup> | p     | Chi bar <sup>2</sup> | P                                                           | Chi bar <sup>2</sup> | p      | Chi bar <sup>2</sup> | p      | Chi bar <sup>2</sup> | p                                                                              | Chi bar <sup>2</sup> | P      | Chi <sup>2</sup> | p      | Chi <sup>2</sup> | p      |
| Likelihood ratio test (comparing with one-level ordinary linear regression) |                                     | 0                    | 1     | .25                  | .308  | 0                    | 1                                                           | 0                    | 1      | .30                  | .292   | 0                    | 1                                                                              | .08                  | .994   | 1.33             | .722   | 0                | 1      |
|                                                                             |                                     |                      |       |                      |       |                      |                                                             | Level1               | Level2 | Level1               | Level2 | Level1               | Level2                                                                         | Level1               | Level2 | Level1           | Level2 | Level1           | Level2 |
| R <sup>2</sup> <sup>a</sup>                                                 |                                     | .043                 | .033  | .050                 | -.038 | .033                 | .908                                                        | .043                 | .033   | .050                 | -.038  | .033                 | .908                                                                           | .043                 | .033   | .050             | -.038  | .033             | .908   |
| <b>Model fit</b>                                                            |                                     |                      |       |                      |       |                      |                                                             |                      |        |                      |        |                      |                                                                                |                      |        |                  |        |                  |        |
| AIC                                                                         |                                     | 4424.062             |       | 2072.032             |       | 2326.775             |                                                             | 4355.577             |        | 2037.884             |        | 2298.306             |                                                                                | 4351.496             |        | 2040.852         |        | 2294.306         |        |
| BIC                                                                         |                                     | 4440.119             |       | 2085.749             |       | 2340.993             |                                                             | 4376.985             |        | 2056.173             |        | 2317.259             |                                                                                | 4362.2               |        | 2068.286         |        | 2303.783         |        |

<sup>a</sup> Bryk/Raudenbush (1992) R<sup>2</sup>, <sup>b</sup> Deviance: Dev=-2ln(L) vgl. Eid, Gollwitzer & Schmitt (2017)

\*\*\*p≤0.001; \*\*p<0.01; \*p<0.05

Table S2.2: Hierarchical linear model comparison by age of group mean standardized results with outcome help-seeking intentions (full-maximum-likelihood-estimation; index i: level 1-unit – survey participants, n=1630; index j: level-2-unit – lifestyles, m=9)

| Model                                                                       | I: Intercept- only (Null Model)     |          |                      |          |                      |         | II: Random-Intercept                                        |          |           |          |           |          | III: Random-intercept & random Slope                                           |                      |           |                  |           |                  |        |       |
|-----------------------------------------------------------------------------|-------------------------------------|----------|----------------------|----------|----------------------|---------|-------------------------------------------------------------|----------|-----------|----------|-----------|----------|--------------------------------------------------------------------------------|----------------------|-----------|------------------|-----------|------------------|--------|-------|
| Help seeking <sub>ij</sub> =                                                | $\theta_0 + u_{0i} + \epsilon_{ij}$ |          |                      |          |                      |         | $\theta_0 + \theta_{1i}shame_{ij} + u_{0i} + \epsilon_{ij}$ |          |           |          |           |          | $\theta_0 + \theta_{1i}shame_{ij} + u_{0i} + u_{1i}shame_{ij} + \epsilon_{ij}$ |                      |           |                  |           |                  |        |       |
|                                                                             | overall                             |          | ≤61 years            |          | >61 years            |         | overall                                                     |          | ≤61 years |          | >61 years |          | overall                                                                        |                      | ≤61 years |                  | >61 years |                  |        |       |
|                                                                             | Coeff                               | SE       | Coeff                | SE       | Coeff                | SE      | Coeff                                                       | SE       | Coeff     | SE       | Coeff     | SE       | Coeff                                                                          | SE                   | Coeff     | SE               | Coeff     | SE               |        |       |
| <b>Fixed Effects</b>                                                        |                                     |          |                      |          |                      |         |                                                             |          |           |          |           |          |                                                                                |                      |           |                  |           |                  |        |       |
| Intercept                                                                   | $\beta_0$                           | ≈0       | 0.025                | .060     | .033                 | -.064   | .038                                                        | .0001    | .025      | .071*    | .032      | -.073    | .038                                                                           | .0001                | .025      | .070*            | .032      | -.073            | .038   |       |
|                                                                             | $\beta_{1i}$                        |          |                      |          |                      |         |                                                             | -.208    |           | -.232    |           | -.184    |                                                                                | -.206                |           | -.238            |           | -.184            |        |       |
|                                                                             |                                     |          |                      |          |                      |         |                                                             | ***      | .025      | ***      | .031      | ***      | .040                                                                           | ***                  | .028      | ***              | .059      | ***              | .040   |       |
| <b>Random Effects</b>                                                       |                                     |          |                      |          |                      |         |                                                             |          |           |          |           |          |                                                                                |                      |           |                  |           |                  |        |       |
|                                                                             |                                     | Est.     | SE                   | Est.     | SE                   | Est.    | SE                                                          | Est.     | SE        | Est.     | SE        | Est.     | SE                                                                             | Est.                 | SE        | Est.             | SE        | Est.             | SE     |       |
|                                                                             | $u^2_{0i}$                          | ≈0       | ≈0                   | ≈0       | ≈0                   | ≈0      | ≈0                                                          | ≈0       | ≈0        | ≈0       | ≈0        | ≈0       | ≈0                                                                             | ≈0                   | -         | ≈0               | ≈0        | ≈0               | -      |       |
|                                                                             | $u^2_{1i}$                          |          |                      |          |                      |         |                                                             |          |           |          |           |          |                                                                                | .001                 | -         | .017             | .016      | ≈0               | -      |       |
| Variance residuals/ overall error term                                      | $\epsilon_{ij}$                     | .994     | 0.036                | .896     | .045                 | 1.091   | .056                                                        | .952     | 0.034     | .839     | .042      | 1.061    | .055                                                                           | .951                 | -         | .826             | .041      | ≈0               | -      |       |
|                                                                             | cov                                 |          |                      |          |                      |         |                                                             |          |           |          |           |          |                                                                                | ≈0                   | -         | ≈0               | .005      | 1.061            | -      |       |
| <b>Intraclass correlation</b>                                               |                                     |          |                      |          |                      |         |                                                             |          |           |          |           |          |                                                                                |                      |           |                  |           |                  |        |       |
|                                                                             | ICC                                 | SE       | ICC                  | SE       | ICC                  | SE      |                                                             |          |           |          |           |          |                                                                                |                      |           |                  |           |                  |        |       |
|                                                                             |                                     | ≈0       | 0                    | ≈0       | ≈0                   | ≈0      | ≈0                                                          |          |           |          |           |          |                                                                                |                      |           |                  |           |                  |        |       |
|                                                                             | Chi bar <sup>2</sup>                | p        | Chi bar <sup>2</sup> | p        | Chi bar <sup>2</sup> | P       |                                                             |          |           |          |           |          |                                                                                | Chi bar <sup>2</sup> | P         | Chi <sup>2</sup> | p         | Chi <sup>2</sup> | p      |       |
| Likelihood ratio test (comparing with one-level ordinary linear regression) |                                     | 0        | 1                    | 0        | 1                    | 0       | 1                                                           | 0        | 1         | 0        | 1         | 0        | 1                                                                              | .08                  | .994      | 3.84             | .279      | 0                | 1      |       |
|                                                                             |                                     |          |                      |          |                      |         |                                                             | Level1   | Level2    | Level1   | Level2    | Level1   | Level2                                                                         | Level1               | Level2    | Level1           | Level2    | Level1           | Level2 |       |
| R <sup>2</sup> <sup>a</sup>                                                 |                                     |          |                      |          |                      |         |                                                             | .043     | .033      | .065     | 38.44     | .028     | -                                                                              | 46.64                | .043      | .033             | .065      | 52.51            | .028   | 46.64 |
| <b>Model fit</b>                                                            |                                     |          |                      |          |                      |         |                                                             |          |           |          |           |          |                                                                                |                      |           |                  |           |                  |        |       |
| DIC <sup>b</sup>                                                            |                                     |          |                      |          |                      |         |                                                             |          |           |          |           |          |                                                                                |                      |           |                  |           |                  |        |       |
| AIC                                                                         |                                     | 4424.062 |                      | 2202.335 |                      | 2214.14 |                                                             | 4355.577 |           | 2148.309 |           | 2195.046 |                                                                                | 4351.496             |           | 2148.470         |           | 2191.046         |        |       |
| BIC                                                                         |                                     | 4440.119 |                      | 2216.407 |                      | 2228.02 |                                                             | 4376.985 |           | 2167.067 |           | 2213.553 |                                                                                | 4362.200             |           | 2176.607         |           | 2200.300         |        |       |

<sup>a</sup> Bryk/Raudenbush (1992) R<sup>2</sup>, <sup>b</sup> Deviance: Dev=-2ln(L) vgl. Eid, Gollwitzer & Schmitt (2017)

\*\*\*p≤0.001; \*\*p<0.01; \*p<0.05

Table S2.3: Hierarchical linear model comparison by having a mental illness or not of group mean standardized results with outcome help-seeking intentions (full-maximum-likelihood-estimation; index i: level 1-unit – survey participants, n=1630; index j: level-2-unit – lifestyles, m=9)

| Model                                                                              | I: Intercept- only (Null Model)     |          |                      |          |                      |          | II: Random-Intercept                                        |          |                      |          |                      |          | III: Random-intercept & random Slope                                           |          |                  |          |                   |         |        |
|------------------------------------------------------------------------------------|-------------------------------------|----------|----------------------|----------|----------------------|----------|-------------------------------------------------------------|----------|----------------------|----------|----------------------|----------|--------------------------------------------------------------------------------|----------|------------------|----------|-------------------|---------|--------|
| Help seeking <sub>ij</sub> =                                                       | $\theta_0 + u_{0i} + \epsilon_{ij}$ |          |                      |          |                      |          | $\theta_0 + \theta_{1i}shame_{ij} + u_{0i} + \epsilon_{ij}$ |          |                      |          |                      |          | $\theta_0 + \theta_{1i}shame_{ij} + u_{0i} + u_{1i}shame_{ij} + \epsilon_{ij}$ |          |                  |          |                   |         |        |
|                                                                                    | overall                             |          | Mental illness       |          | No mental illness    |          | overall                                                     |          | Mental illness       |          | No mental illness    |          | overall                                                                        |          | Mental illness   |          | No mental illness |         |        |
|                                                                                    | Coeff                               | SE       | Coeff                | SE       | Coeff                | SE       | Coeff                                                       | SE       | Coeff                | SE       | Coeff                | SE       | Coeff                                                                          | SE       | Coeff            | SE       | Coeff             | SE      |        |
| <i>Fixed Effects</i>                                                               |                                     |          |                      |          |                      |          |                                                             |          |                      |          |                      |          |                                                                                |          |                  |          |                   |         |        |
| Intercept                                                                          | $\beta_0$                           | ≈0       | .025                 | .010     | .043                 | -.001    | .031                                                        | .0001    | .025                 | .022     | .044                 | -.018    | .030                                                                           | .0001    | .025             | .010     | 0.50              | -.018   | .030   |
|                                                                                    | $\beta_{1i}$                        |          | Shame                |          |                      |          |                                                             | -.208    |                      | -.091*   | .410                 | -.281    |                                                                                | -.206    |                  | -.117*   | 0.057             | -.281   |        |
|                                                                                    |                                     |          |                      |          |                      |          |                                                             | ***      | .025                 |          |                      | ***      | .031                                                                           | ***      | .028             |          |                   | ***     | .031   |
| <i>Random Effects</i>                                                              |                                     |          |                      |          |                      |          |                                                             |          |                      |          |                      |          |                                                                                |          |                  |          |                   |         |        |
|                                                                                    |                                     | Est.     | SE                   | Est.     | SE                   | Est.     | SE                                                          | Est.     | SE                   | Est.     | SE                   | Est.     | SE                                                                             | Est.     | SE               | Est.     | SE                | Est.    | SE     |
|                                                                                    | $u^2_{0i}$                          | ≈0       | ≈0                   | ≈0       | ≈0                   | ≈0       | ≈0                                                          | ≈0       | ≈0                   | ≈0       | ≈0                   | ≈0       | ≈0                                                                             | ≈0       | -                | .004     | .009              | ≈0      | -      |
|                                                                                    | $u^2_{1i}$                          |          |                      |          |                      |          |                                                             |          |                      |          |                      |          |                                                                                | .001     | -                | .010     | .016              | ≈0      | -      |
| <i>Variance residuals/ overall error term</i>                                      |                                     |          |                      |          |                      |          |                                                             |          |                      |          |                      |          |                                                                                |          |                  |          |                   |         |        |
|                                                                                    | $\epsilon_{ij}$                     | .994     | 0.036                | .981     | .062                 | .994     | .043                                                        | .952     | 0.034                | .971     | .061                 | .922     | .040                                                                           | .951     | -                | .960     | .061              | .922    | -      |
|                                                                                    | cov                                 |          |                      |          |                      |          |                                                             |          |                      |          |                      |          |                                                                                | ≈0       | -                | .006     | .010              | ≈0      | -      |
| <i>Intraclass correlation</i>                                                      |                                     |          |                      |          |                      |          |                                                             |          |                      |          |                      |          |                                                                                |          |                  |          |                   |         |        |
|                                                                                    | ICC                                 | SE       | ICC                  | SE       | ICC                  | SE       |                                                             |          |                      |          |                      |          |                                                                                |          |                  |          |                   |         |        |
|                                                                                    |                                     | ≈0       | 0                    | ≈0       | ≈0                   | ≈0       | 0                                                           |          |                      |          |                      |          |                                                                                |          |                  |          |                   |         |        |
|                                                                                    | Chi bar <sup>2</sup>                | p        | Chi bar <sup>2</sup> | p        | Chi bar <sup>2</sup> | P        | Chi bar <sup>2</sup>                                        | p        | Chi bar <sup>2</sup> | P        | Chi bar <sup>2</sup> | p        | Chi bar <sup>2</sup>                                                           | P        | Chi <sup>2</sup> | p        | Chi <sup>2</sup>  | p       |        |
| <i>Likelihood ratio test (comparing with one-level ordinary linear regression)</i> |                                     |          |                      |          |                      |          |                                                             |          |                      |          |                      |          |                                                                                |          |                  |          |                   |         |        |
|                                                                                    |                                     | 0        | 1                    | 0        | 1                    | 0        | 1                                                           | 0        | 1                    | 0        | 1                    | 0        | 1                                                                              | .08      | .994             | .68      | .877              | 0       | 1      |
|                                                                                    |                                     |          |                      |          |                      |          |                                                             | Level1   | Level2               | Level1   | Level2               | Level1   | Level2                                                                         | Level1   | Level2           | Level1   | Level2            | Level1  | Level2 |
|                                                                                    | R <sup>2</sup> <sup>a</sup>         | .043     | .033                 | .010     | .999                 | .073     | 1.000                                                       | .043     | .033                 | .027     | ≈0                   | .073     | 1.000                                                                          | .043     | .033             | .027     | ≈0                | .073    | 1.000  |
| <i>Model fit</i>                                                                   |                                     |          |                      |          |                      |          |                                                             |          |                      |          |                      |          |                                                                                |          |                  |          |                   |         |        |
|                                                                                    | DIC <sup>b</sup>                    |          |                      |          |                      |          |                                                             |          |                      |          |                      |          |                                                                                |          |                  |          |                   |         |        |
|                                                                                    | AIC                                 | 4424.062 |                      | 1437.686 |                      | 2967.745 |                                                             | 4355.577 |                      | 1434.815 |                      | 2888.910 |                                                                                | 4351.496 |                  | 1438.133 |                   | 2884.91 |        |
|                                                                                    | BIC                                 | 4440.119 |                      | 1450.378 |                      | 2982.603 |                                                             | 4376.985 |                      | 1451.737 |                      | 2908.717 |                                                                                | 4362.200 |                  | 1463.516 |                   | 2894.81 |        |

<sup>a</sup> Bryk/Raudenbush (1992) R<sup>2</sup>, <sup>b</sup> Deviance: Dev=-2ln(L) vgl. Eid, Gollwitzer & Schmitt (2017)

\*\*\*p<0.001; \*\*p<0.01; \*p<0.05
